# Supplementary material for: A low-temperature thermoelectric transport study of non-stoichiometric AgSbTe2
Source: Royal Society of Chemistry journal article supplement (doi:10.1039/d4cp01171f), 2024-01-01
Supplement: d4cp01171f1.pdf [file d4cp01171f1.pdf]

## A low-temperature thermoelectric transport study of non-stoichiometric AgSbTe<sub>2</sub>

Chinnu V. Devan<sup>1,4</sup>, Mahima M. Kurian<sup>2</sup>, P. N. Santhosh<sup>2</sup>, Manoj Raama Varma<sup>3,4,\*</sup>

Biswapriya Deb<sup>1,4,\*</sup>

<sup>1</sup>*Centre for Sustainable Energy Technology (C-SET), CSIR- National Institute for Interdisciplinary Science and Technology (NIIST), Thiruvananthapuram- 695019, Kerala, India*

<sup>2</sup>*Department of Physics, Indian Institute of Technology Madras (IITM), Chennai 600036, India*

<sup>3</sup>*Materials Science and Technology Division, CSIR- National Institute for Interdisciplinary Science and Technology (NIIST), Thiruvananthapuram- 695019, Kerala, India*

<sup>4</sup>*Academy of Scientific and Innovative Research (AcSIR), Ghaziabad-201002, India*

\*Corresponding authors

Email: [manojraamavarma@gmail.com](mailto:manojraamavarma@gmail.com), [biswapriya.deb@niist.res.in](mailto:biswapriya.deb@niist.res.in)

Tel.: +91-471-2515478, +91-471-2515377

Fax: +91-471-2491712

### Characterization techniques

The crystal structure of synthesized AgSbTe<sub>2</sub> was analysed by powder X-ray diffraction techniques (Empyrean 3, PANalytical X-ray diffractometer) using Cu-K $\alpha$  radiation with wavelength 1.5406Å in the 2 $\theta$  range 20° — 90° with a step size of 0.005°. The XRD data was refined using the software GSAS2. The microstructure and local composition were investigated by scanning electron microscopy (Zeiss EVO 18 cryo-SEM, operating voltage of 15 kV) and high-resolution transmission electron microscopy (HRTEM (FEI Tecnai F20, operated at 300 kV). The elemental mapping of the samples was done by TEM-EDS. The density of the pellets was measured using the Archimedes method and the Vickers microhardness of the material was calculated using Vickers Microhardness tester - Banbros. The low temperature electrical and thermal transport measurements and heat capacity of the samples were done through the electrical transport option (ETO), thermal transport option (TTO, with  $\pm$  5% accuracy of thermal

conductance and Seebeck coefficient, 0.01 % for resistivity) and heat capacity set-up of physical property measurement system (PPMS, Quantum Design).

Table 1. Elemental weight percentage of AgSbTe<sub>2</sub> calculated and obtained from SEM-EDX

| Element | Actual weight % | Average weight % |
|---------|-----------------|------------------|
| Ag      | 22.24           | 20.61            |
| Sb      | 25.11           | 26.86            |
| Te      | 52.63           | 52.76            |

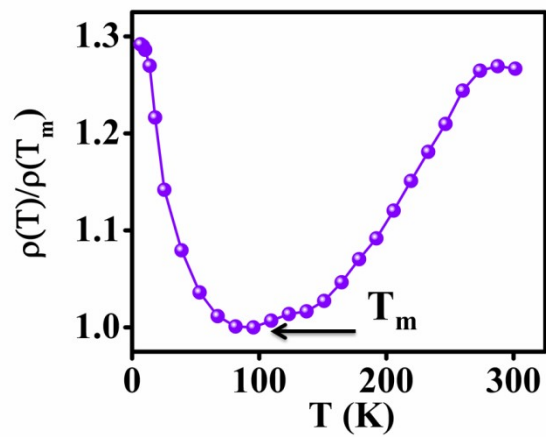

Figure S1. Normalized resistivity data versus T

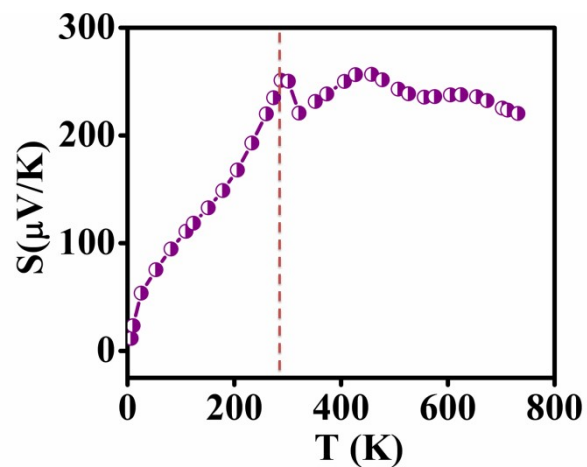

Figure S2. Variation of S with T

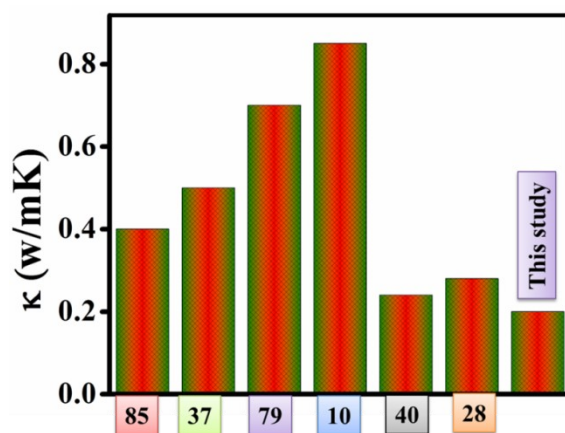

Figure S3. A comparison study on the thermal conductivity of the present material with previous reports

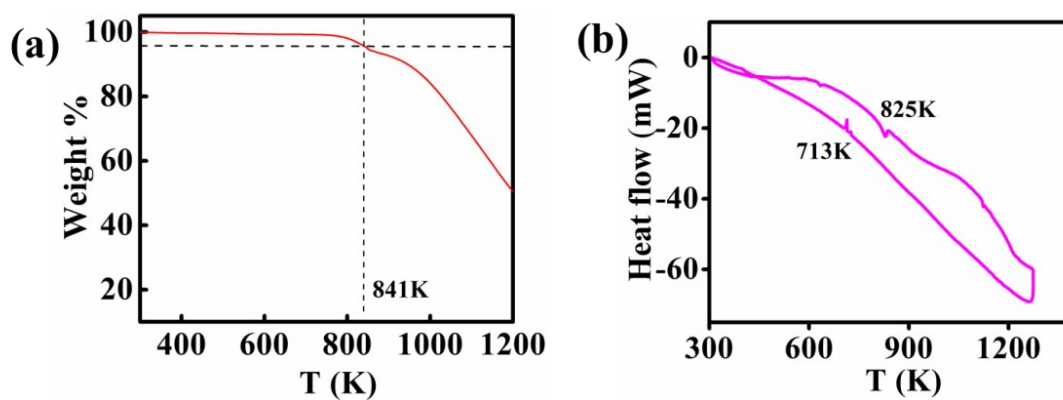

Figure S4. TGA and DTA of the material

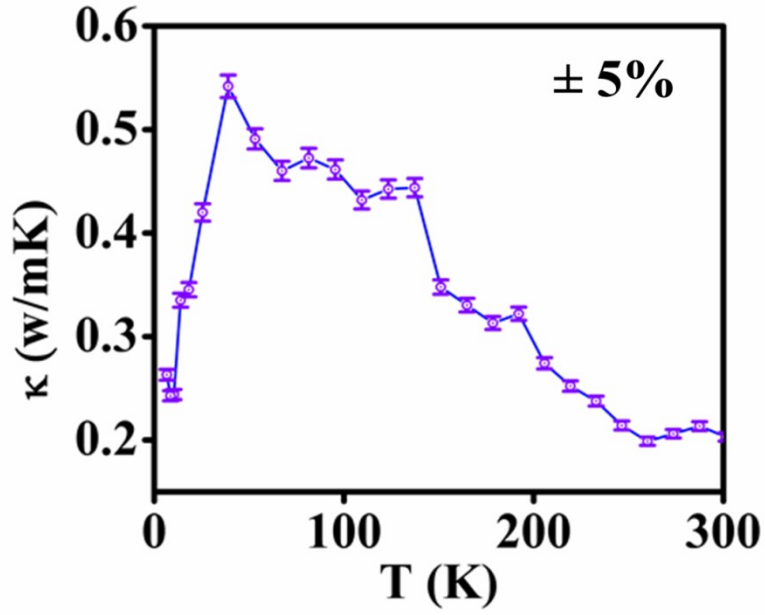

Figure S5 a: Plot of measured thermal conductivity versus temperature with error bar of  $\pm 5\%$

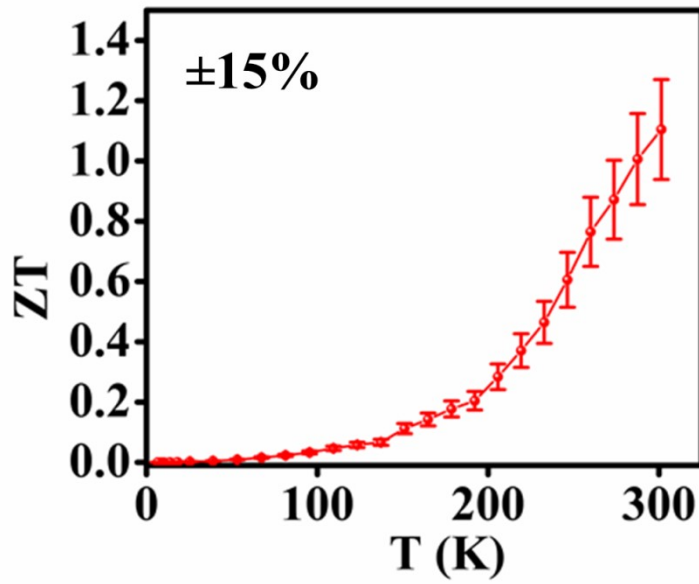

Figure S5 b: Plot of measured figure of merit versus temperature with error bar of  $\pm 15\%$
